# Supplementary material
Source: Springer Nature journal article supplement (https://www.springermedizin.de/resource/supplementary/12885_2012_3637_MOESM3_ESM.pdf/9463958)
Supplement: MOESM3 [file 9463958]

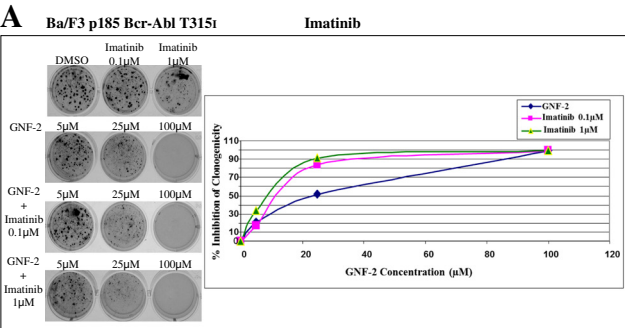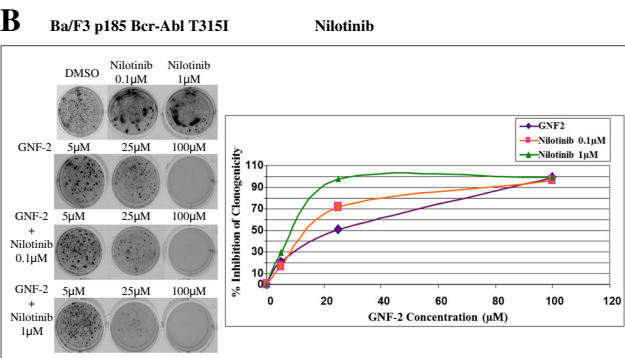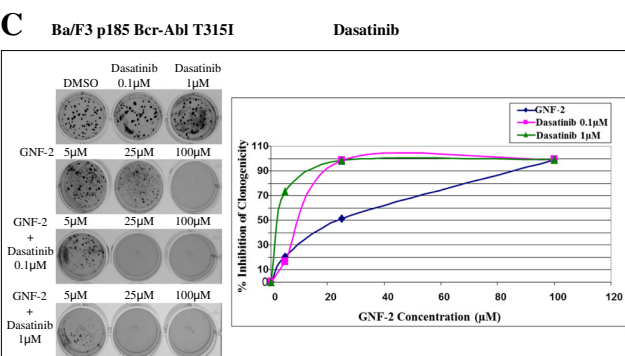

**D** Ba/F3 p185 Bcr-Abl T315I

|       | AKIs                           | IC <sub>50</sub> ( $\mu\text{M}$ ) |
|-------|--------------------------------|------------------------------------|
| GNF-2 |                                | 25 $\pm$ 0.707                     |
| GNF-2 | Imatinib (0.1 $\mu\text{M}$ )  | 14.8 $\pm$ 3.535                   |
| GNF-2 | Nilotinib (0.1 $\mu\text{M}$ ) | 16.5 $\pm$ 1.606                   |
| GNF-2 | Dasatinib (0.1 $\mu\text{M}$ ) | 13 $\pm$ 1.414                     |
| GNF-2 | Imatinib (1 $\mu\text{M}$ )    | 10.5 $\pm$ 0.707                   |
| GNF-2 | Nilotinib (1 $\mu\text{M}$ )   | 13 $\pm$ 3.535                     |
| GNF-2 | Dasatinib (1 $\mu\text{M}$ )   | 3.3 $\pm$ 0.354                    |
